# Supplementary material for: Health Care Utilization in the 6 Months Following SARS-CoV-2 Infection
Source: PubMed Central journal article supplement (PMC9375168; doi:10.1001/jamanetworkopen.2022.25657), 2022-08-12
Supplement: jamanetwopen-e2225657-s001.pdf [file jamanetwopen-e2225657-s001.pdf]

## Supplemental Online Content

Tartof SY, Malden DE, Liu ILA, et al. Health care utilization in the 6 months following SARS-CoV-2 infection. *JAMA Netw Open*. 2022;5(8):e2225657.  
doi:10.1001/jamanetworkopen.2022.25657

**eTable 1.** All 44 Conditions and *International Statistical Classification of Diseases, Tenth Revision, Clinical Modification (ICD-10-CM)* Codes

**eTable 2.** Health Care Utilization Associated With COVID-19 for Select Post-COVID Conditions (PCC): Patient With Positive SARS-CoV-2 Test Results vs Those With Negative Results

**eFigure 1.** Health Care Utilization for Select Post-COVID-19 Conditions (PCC) by Time Interval After Index Date: Patient With Positive SARS-CoV-2 Test Results vs Those With Negative Results

**eFigure 2.** Health Care Utilization for Select Post-COVID-19 Conditions (PCC) With and Without Censoring Follow-up at COVID-19 Vaccination

**eFigure 3.** Health Care Utilization for Select Post-COVID-19 Conditions (PCC) Among Children Aged Younger Than 18 Years

This supplemental material has been provided by the authors to give readers additional information about their work.

**eTable 1.** All 44 Conditions and *International Statistical Classification of Diseases, Tenth Revision, Clinical Modification (ICD-10-CM) Codes*

| Classification                                                   | ICD-10-CM code                                                       |
|------------------------------------------------------------------|----------------------------------------------------------------------|
| Abdominal pain                                                   | R10                                                                  |
| Anxiety                                                          | F40, F41, F42, F43, F44, F45, F48, R45                               |
| Arrhythmias                                                      | R00, I47, I48, I49                                                   |
| Ataxia/movement disorders                                        | R26, R27, G26                                                        |
| Autonomic dysfunction                                            | I95.1, I49, G90, R55                                                 |
| Bronchitis                                                       | J20, J40, J41, J42                                                   |
| Cardiac complications, non-arrhythmia (Myocarditis/Pericarditis) | I30, I40, I51.4, B33                                                 |
| Change in bowel habits                                           | K58, K59, A08, A09, R19.4, R19.7                                     |
| Cough                                                            | R05                                                                  |
| COVID-19                                                         | U07.1, U09.9, J12.82, B97.29, B34.2, M35.81                          |
| Cytopenia                                                        | D69, D72.81                                                          |
| Delirium or encephalopathy                                       | F05, R40.0, R41, R44                                                 |
| Dementia                                                         | F01, F02, F03, G31                                                   |
| Diabetes                                                         | E10, E11                                                             |
| Dyspnea                                                          | R06                                                                  |
| Encephalitis                                                     | A85, A86, G04, G05, R29                                              |
| Pulmonary embolism/Deep vein thrombosis (PE/DVT)                 | I26, I82                                                             |
| Mood disorders                                                   | F30, F31, F32, F33, F34, F38, F39                                    |
| ENT-Disorders of ear , nose and throat disorders                 | H90, H91, H92, H93, J31, R43, R13                                    |
| Ophthalmologic conditions following stroke                       | H53, H54                                                             |
| Constitutional fever/malaise/fatigue                             | R50, R61, R53, G93.3                                                 |
| Alopecia                                                         | L63, L65                                                             |
| Headache                                                         | G43, G44, R51                                                        |
| Hypoxemia                                                        | R09                                                                  |
| Infectious disease sequelae                                      | B94                                                                  |
| Interstitial pulmonary disease (ILD)                             | J84                                                                  |
| Lymphadenopathy                                                  | R59                                                                  |
| Myalgia/arthralgia                                               | M02, M25, M79                                                        |
| Myoneural Disorders                                              | G72, M60                                                             |
| Nausea/vomiting                                                  | R11                                                                  |
| Pain in throat or chest                                          | R07                                                                  |
| Skin disorders                                                   | B09, R20, R21, R23                                                   |
| Stroke                                                           | I64, I69, G45, G46, I60, I61, I62, I63                               |
| Parkinsonism and other extrapyramidal syndromes                  | G21, G24, G25                                                        |
| Peripheral nerve disorders                                       | G50, G51, G52, G53, G54, G55, G56, G57, G58, G59, G61, G62, G64, G65 |
| Pulmonary edema                                                  | J81                                                                  |
| Psychosis                                                        | F20, F21, F22, F23, F24, F25, F28, F29                               |
| Sleep disorders                                                  | G47, F51                                                             |
| Stress cardiomyopathy                                            | I51.81                                                               |
| Renal diseases                                                   | N18, N19                                                             |
| Seizures                                                         | G40, G41                                                             |
| Thyroid disorders                                                | E03, E06                                                             |
| Vertigo                                                          | A88, H81, R42                                                        |
| Weight loss                                                      | R63, R64                                                             |

**eTable 2.** Health Care Utilization Associated With COVID-19 for Select Post-COVID Conditions (PCC): Patient With Positive SARS-CoV-2 Test Results vs Those With Negative Results

| Number of Visits                        | Negative (N=127,859) |                 |            | Positive (N=127,859) |                 |            | Ratio of Rate Ratio (95% CI) |
|-----------------------------------------|----------------------|-----------------|------------|----------------------|-----------------|------------|------------------------------|
|                                         | 2019                 | 2020            | Rate Ratio | 2019                 | 2020            | Rate Ratio |                              |
| COVID-19                                |                      |                 | 87.2       |                      |                 | 1698.2     | 19.47 (10.47-36.22)          |
| 0                                       | 127837 (99.98%)      | 126071 (98.6%)  |            | 127828 (99.98%)      | 104568 (81.78%) |            |                              |
| 1                                       | 14 (0.01%)           | 1170 (0.92%)    |            | 29 (0.02%)           | 12963 (10.14%)  |            |                              |
| 2                                       | 4 (0%)               | 322 (0.25%)     |            | 2 (0%)               | 4366 (3.41%)    |            |                              |
| 3+                                      | 4 (0%)               | 296 (0.23%)     |            | 0 (0%)               | 5962 (4.66%)    |            |                              |
| Infectious disease sequelae             |                      |                 | 6.0        |                      |                 | 516.0      | 86.00 (5.07-1458.33)         |
| 0                                       | 127858 (100%)        | 127834 (99.98%) |            | 127858 (100%)        | 127585 (99.79%) |            |                              |
| 1                                       | 0 (0%)               | 15 (0.01%)      |            | 1 (0%)               | 174 (0.14%)     |            |                              |
| 2                                       | 1 (0%)               | 6 (0%)          |            | 0 (0%)               | 48 (0.04%)      |            |                              |
| 3+                                      |                      | 4 (0%)          |            |                      | 52 (0.04%)      |            |                              |
| Alopecia                                |                      |                 | 1.4        |                      |                 | 3.5        | 2.52 (2.17-2.92)             |
| 0                                       | 127202 (99.49%)      | 126977 (99.31%) |            | 127224 (99.5%)       | 125614 (98.24%) |            |                              |
| 1                                       | 500 (0.39%)          | 629 (0.49%)     |            | 476 (0.37%)          | 1674 (1.31%)    |            |                              |
| 2                                       | 96 (0.08%)           | 170 (0.13%)     |            | 108 (0.08%)          | 404 (0.32%)     |            |                              |
| 3+                                      | 61 (0.05%)           | 83 (0.06%)      |            | 51 (0.04%)           | 167 (0.13%)     |            |                              |
| Bronchitis                              |                      |                 | 0.3        |                      |                 | 0.6        | 1.85 (1.62-2.12)             |
| 0                                       | 125487 (98.14%)      | 127195 (99.48%) |            | 125545 (98.19%)      | 126732 (99.12%) |            |                              |
| 1                                       | 2006 (1.57%)         | 511 (0.4%)      |            | 1901 (1.49%)         | 818 (0.64%)     |            |                              |
| 2                                       | 284 (0.22%)          | 100 (0.08%)     |            | 327 (0.26%)          | 194 (0.15%)     |            |                              |
| 3+                                      | 82 (0.06%)           | 53 (0.04%)      |            | 86 (0.07%)           | 115 (0.09%)     |            |                              |
| Pulmonary embolism/deep vein thrombosis |                      |                 | 1.8        |                      |                 | 3.1        | 1.74 (1.36-2.23)             |
| 0                                       | 127451 (99.68%)      | 127201 (99.49%) |            | 127531 (99.74%)      | 127102 (99.41%) |            |                              |
| 1                                       | 172 (0.13%)          | 240 (0.19%)     |            | 128 (0.1%)           | 235 (0.18%)     |            |                              |
| 2                                       | 85 (0.07%)           | 129 (0.1%)      |            | 80 (0.06%)           | 143 (0.11%)     |            |                              |
| 3+                                      | 151 (0.12%)          | 289 (0.23%)     |            | 120 (0.09%)          | 379 (0.3%)      |            |                              |

|                                      |                 |                 |     |                 |                 |     |                  |
|--------------------------------------|-----------------|-----------------|-----|-----------------|-----------------|-----|------------------|
| Dyspnea                              |                 |                 | 1.4 |                 |                 | 2.4 | 1.73 (1.61-1.86) |
| 0                                    | 123232 (96.38%) | 122426 (95.75%) |     | 123897 (96.9%)  | 120547 (94.28%) |     |                  |
| 1                                    | 3250 (2.54%)    | 3439 (2.69%)    |     | 2750 (2.15%)    | 4240 (3.32%)    |     |                  |
| 2                                    | 821 (0.64%)     | 1013 (0.79%)    |     | 691 (0.54%)     | 1461 (1.14%)    |     |                  |
| 3+                                   | 556 (0.43%)     | 981 (0.77%)     |     | 521 (0.41%)     | 1611 (1.26%)    |     |                  |
| Hypoxemia                            |                 |                 | 1.1 |                 |                 | 1.7 | 1.48 (1.37-1.60) |
| 0                                    | 124418 (97.31%) | 124434 (97.32%) |     | 125150 (97.88%) | 124262 (97.19%) |     |                  |
| 1                                    | 2834 (2.22%)    | 2558 (2%)       |     | 2263 (1.77%)    | 2525 (1.97%)    |     |                  |
| 2                                    | 442 (0.35%)     | 517 (0.4%)      |     | 341 (0.27%)     | 643 (0.5%)      |     |                  |
| 3+                                   | 165 (0.13%)     | 350 (0.27%)     |     | 105 (0.08%)     | 429 (0.34%)     |     |                  |
| Cough                                |                 |                 | 0.8 |                 |                 | 1.2 | 1.45 (1.37-1.53) |
| 0                                    | 119081 (93.13%) | 121437 (94.98%) |     | 119738 (93.65%) | 119933 (93.8%)  |     |                  |
| 1                                    | 6458 (5.05%)    | 4303 (3.37%)    |     | 6032 (4.72%)    | 5033 (3.94%)    |     |                  |
| 2                                    | 1563 (1.22%)    | 1289 (1.01%)    |     | 1412 (1.1%)     | 1659 (1.3%)     |     |                  |
| 3+                                   | 757 (0.59%)     | 830 (0.65%)     |     | 677 (0.53%)     | 1234 (0.97%)    |     |                  |
| Constitutional-Fever/malaise/fatigue |                 |                 | 1.4 |                 |                 | 2.0 | 1.41 (1.31-1.51) |
| 0                                    | 121633 (95.13%) | 120796 (94.48%) |     | 122549 (95.85%) | 119815 (93.71%) |     |                  |
| 1                                    | 4626 (3.62%)    | 4688 (3.67%)    |     | 4048 (3.17%)    | 5201 (4.07%)    |     |                  |
| 2                                    | 977 (0.76%)     | 1277 (1%)       |     | 763 (0.6%)      | 1459 (1.14%)    |     |                  |
| 3+                                   | 623 (0.49%)     | 1098 (0.86%)    |     | 499 (0.39%)     | 1384 (1.08%)    |     |                  |
| Pain in throat or chest              |                 |                 | 1.2 |                 |                 | 1.5 | 1.28 (1.20-1.36) |
| 0                                    | 121656 (95.15%) | 121265 (94.84%) |     | 122479 (95.79%) | 120677 (94.38%) |     |                  |
| 1                                    | 4085 (3.19%)    | 4163 (3.26%)    |     | 3636 (2.84%)    | 4388 (3.43%)    |     |                  |
| 2                                    | 1265 (0.99%)    | 1330 (1.04%)    |     | 1039 (0.81%)    | 1560 (1.22%)    |     |                  |
| 3+                                   | 853 (0.67%)     | 1101 (0.86%)    |     | 705 (0.55%)     | 1234 (0.97%)    |     |                  |
| Ear, nose and throat disorders       |                 |                 | 1.2 |                 |                 | 1.5 | 1.23(1.15-1.32)  |
| 0                                    | 122417 (95.74%) | 121690 (95.18%) |     | 123506 (96.6%)  | 122084 (95.48%) |     |                  |
| 1                                    | 3606 (2.82%)    | 3882 (3.04%)    |     | 3034 (2.37%)    | 3653 (2.86%)    |     |                  |
| 2                                    | 1095 (0.86%)    | 1301 (1.02%)    |     | 808 (0.63%)     | 1205 (0.94%)    |     |                  |
| 3+                                   | 741 (0.58%)     | 986 (0.77%)     |     | 511 (0.4%)      | 917 (0.72%)     |     |                  |
| Delirium or encephalopathy           |                 |                 | 1.6 |                 |                 | 1.9 | 1.22 (1.02-1.47) |
| 0                                    | 126673 (99.07%) | 126319 (98.8%)  |     | 126916 (99.26%) | 126385 (98.85%) |     |                  |

|                 |                 |                 |     |                 |                 |     |                  |
|-----------------|-----------------|-----------------|-----|-----------------|-----------------|-----|------------------|
| 1               | 793 (0.62%)     | 914 (0.71%)     |     | 614 (0.48%)     | 860 (0.67%)     |     |                  |
| 2               | 217 (0.17%)     | 317 (0.25%)     |     | 184 (0.14%)     | 312 (0.24%)     |     |                  |
| 3+              | 176 (0.14%)     | 309 (0.24%)     |     | 145 (0.11%)     | 302 (0.24%)     |     |                  |
| Arrhythmias     |                 |                 | 1.4 |                 |                 | 1.7 | 1.22 (1.14-1.32) |
| 0               | 123089 (96.27%) | 122156 (95.54%) |     | 124037 (97.01%) | 122426 (95.75%) |     |                  |
| 1               | 2424 (1.9%)     | 2612 (2.04%)    |     | 1964 (1.54%)    | 2438 (1.91%)    |     |                  |
| 2               | 982 (0.77%)     | 1174 (0.92%)    |     | 774 (0.61%)     | 1152 (0.9%)     |     |                  |
| 3+              | 1364 (1.07%)    | 1917 (1.5%)     |     | 1084 (0.85%)    | 1843 (1.44%)    |     |                  |
| Skin disorders  |                 |                 | 1.1 |                 |                 | 1.3 | 1.12 (1.04-1.21) |
| 0               | 123265 (96.41%) | 123286 (96.42%) |     | 123954 (96.95%) | 123505 (96.59%) |     |                  |
| 1               | 3630 (2.84%)    | 3369 (2.63%)    |     | 3073 (2.4%)     | 3229 (2.53%)    |     |                  |
| 2               | 653 (0.51%)     | 734 (0.57%)     |     | 577 (0.45%)     | 710 (0.56%)     |     |                  |
| 3+              | 311 (0.24%)     | 470 (0.37%)     |     | 255 (0.2%)      | 415 (0.32%)     |     |                  |
| Sleep disorders |                 |                 | 1.3 |                 |                 | 1.4 | 1.07 (1.01-1.13) |
| 0               | 119809 (93.7%)  | 118982 (93.06%) |     | 121595 (95.1%)  | 120263 (94.06%) |     |                  |
| 1               | 4645 (3.63%)    | 4730 (3.7%)     |     | 3594 (2.81%)    | 4170 (3.26%)    |     |                  |
| 2               | 1589 (1.24%)    | 1755 (1.37%)    |     | 1252 (0.98%)    | 1447 (1.13%)    |     |                  |
| 3+              | 1816 (1.42%)    | 2392 (1.87%)    |     | 1418 (1.11%)    | 1979 (1.55%)    |     |                  |
| Diabetes        |                 |                 | 1.2 |                 |                 | 1.3 | 1.06 (1.02-1.09) |
| 0               | 116179 (90.86%) | 115991 (90.72%) |     | 114997 (89.94%) | 114075 (89.22%) |     |                  |
| 1               | 3573 (2.79%)    | 3304 (2.58%)    |     | 4305 (3.37%)    | 4120 (3.22%)    |     |                  |
| 2               | 2442 (1.91%)    | 2323 (1.82%)    |     | 2831 (2.21%)    | 2807 (2.2%)     |     |                  |
| 3+              | 5665 (4.43%)    | 6241 (4.88%)    |     | 5726 (4.48%)    | 6857 (5.36%)    |     |                  |
| Headache        |                 |                 | 1.1 |                 |                 | 1.2 | 1.06 (1.00-1.11) |
| 0               | 119328 (93.33%) | 118548 (92.72%) |     | 120352 (94.13%) | 119531 (93.49%) |     |                  |
| 1               | 5406 (4.23%)    | 5748 (4.5%)     |     | 4959 (3.88%)    | 5183 (4.05%)    |     |                  |
| 2               | 1767 (1.38%)    | 1928 (1.51%)    |     | 1458 (1.14%)    | 1696 (1.33%)    |     |                  |
| 3+              | 1358 (1.06%)    | 1635 (1.28%)    |     | 1090 (0.85%)    | 1449 (1.13%)    |     |                  |
| Anxiety         |                 |                 | 1.4 |                 |                 | 1.4 | 1.05 (1.01-1.10) |
| 0               | 112310 (87.84%) | 110352 (86.31%) |     | 116944 (91.46%) | 114581 (89.62%) |     |                  |
| 1               | 7071 (5.53%)    | 7080 (5.54%)    |     | 5404 (4.23%)    | 5895 (4.61%)    |     |                  |
| 2               | 2890 (2.26%)    | 3129 (2.45%)    |     | 2099 (1.64%)    | 2426 (1.9%)     |     |                  |
| 3+              | 5588 (4.37%)    | 7298 (5.71%)    |     | 3412 (2.67%)    | 4957 (3.88%)    |     |                  |

|                    |                 |                 |     |                 |                 |     |                  |
|--------------------|-----------------|-----------------|-----|-----------------|-----------------|-----|------------------|
| Myalgia/arthralgia |                 |                 | 1.2 |                 |                 | 1.1 | 0.94 (0.90-0.97) |
| 0                  | 108666 (84.99%) | 108807 (85.1%)  |     | 111362 (87.1%)  | 111641 (87.32%) |     |                  |
| 1                  | 10246 (8.01%)   | 9405 (7.36%)    |     | 9356 (7.32%)    | 8482 (6.63%)    |     |                  |
| 2                  | 3961 (3.1%)     | 3904 (3.05%)    |     | 3354 (2.62%)    | 3361 (2.63%)    |     |                  |
| 3+                 | 4986 (3.9%)     | 5743 (4.49%)    |     | 3787 (2.96%)    | 4375 (3.42%)    |     |                  |
| Nausea/vomiting    |                 |                 | 1.1 |                 |                 | 1.0 | 0.89 (0.82-0.97) |
| 0                  | 123513 (96.6%)  | 123759 (96.79%) |     | 124247 (97.18%) | 124709 (97.54%) |     |                  |
| 1                  | 3345 (2.62%)    | 2846 (2.23%)    |     | 2867 (2.24%)    | 2305 (1.8%)     |     |                  |
| 2                  | 619 (0.48%)     | 702 (0.55%)     |     | 502 (0.39%)     | 510 (0.4%)      |     |                  |
| 3+                 | 382 (0.3%)      | 552 (0.43%)     |     | 243 (0.19%)     | 335 (0.26%)     |     |                  |
| Stroke             |                 |                 | 1.8 |                 |                 | 1.4 | 0.78 (0.61-0.99) |
| 0                  | 127158 (99.45%) | 126909 (99.26%) |     | 127212 (99.49%) | 127103 (99.41%) |     |                  |
| 1                  | 301 (0.24%)     | 356 (0.28%)     |     | 278 (0.22%)     | 295 (0.23%)     |     |                  |
| 2                  | 143 (0.11%)     | 169 (0.13%)     |     | 144 (0.11%)     | 146 (0.11%)     |     |                  |
| 3+                 | 257 (0.2%)      | 425 (0.33%)     |     | 225 (0.18%)     | 315 (0.25%)     |     |                  |
| Dementia           |                 |                 | 2.1 |                 |                 | 1.6 | 0.77 (0.63-0.94) |
| 0                  | 127275 (99.54%) | 126929 (99.27%) |     | 127102 (99.41%) | 126742 (99.13%) |     |                  |
| 1                  | 285 (0.22%)     | 383 (0.3%)      |     | 315 (0.25%)     | 443 (0.35%)     |     |                  |
| 2                  | 110 (0.09%)     | 199 (0.16%)     |     | 163 (0.13%)     | 245 (0.19%)     |     |                  |
| 3+                 | 189 (0.15%)     | 348 (0.27%)     |     | 279 (0.22%)     | 429 (0.34%)     |     |                  |
| Lymphadenopathy    |                 |                 | 1.5 |                 |                 | 1.1 | 0.76 (0.61-0.95) |
| 0                  | 127228 (99.51%) | 127087 (99.4%)  |     | 127337 (99.59%) | 127332 (99.59%) |     |                  |
| 1                  | 464 (0.36%)     | 495 (0.39%)     |     | 371 (0.29%)     | 368 (0.29%)     |     |                  |
| 2                  | 109 (0.09%)     | 128 (0.1%)      |     | 96 (0.08%)      | 82 (0.06%)      |     |                  |
| 3+                 | 58 (0.05%)      | 149 (0.12%)     |     | 55 (0.04%)      | 77 (0.06%)      |     |                  |
| Psychosis          |                 |                 | 1.7 |                 |                 | 1.2 | 0.74 (0.59-0.92) |
| 0                  | 127406 (99.65%) | 127217 (99.5%)  |     | 127539 (99.75%) | 127494 (99.71%) |     |                  |
| 1                  | 154 (0.12%)     | 202 (0.16%)     |     | 122 (0.1%)      | 151 (0.12%)     |     |                  |
| 2                  | 92 (0.07%)      | 103 (0.08%)     |     | 75 (0.06%)      | 51 (0.04%)      |     |                  |
| 3+                 | 207 (0.16%)     | 337 (0.26%)     |     | 123 (0.1%)      | 163 (0.13%)     |     |                  |

PCC = Post-COVID Conditions, RRR= Relative Rate Ratio, CI= Confidence Interval.

\*PCC outcomes presented are limited to those conditions that were statistically significant (24 of 44 conditions that were evaluated).

**eFigure 1.** Health Care Utilization for Select Post-COVID-19 Conditions (PCC)\*\* by Time Interval After Index Date: Patient With Positive SARS-CoV-2 Test Results vs Those With Negative Results

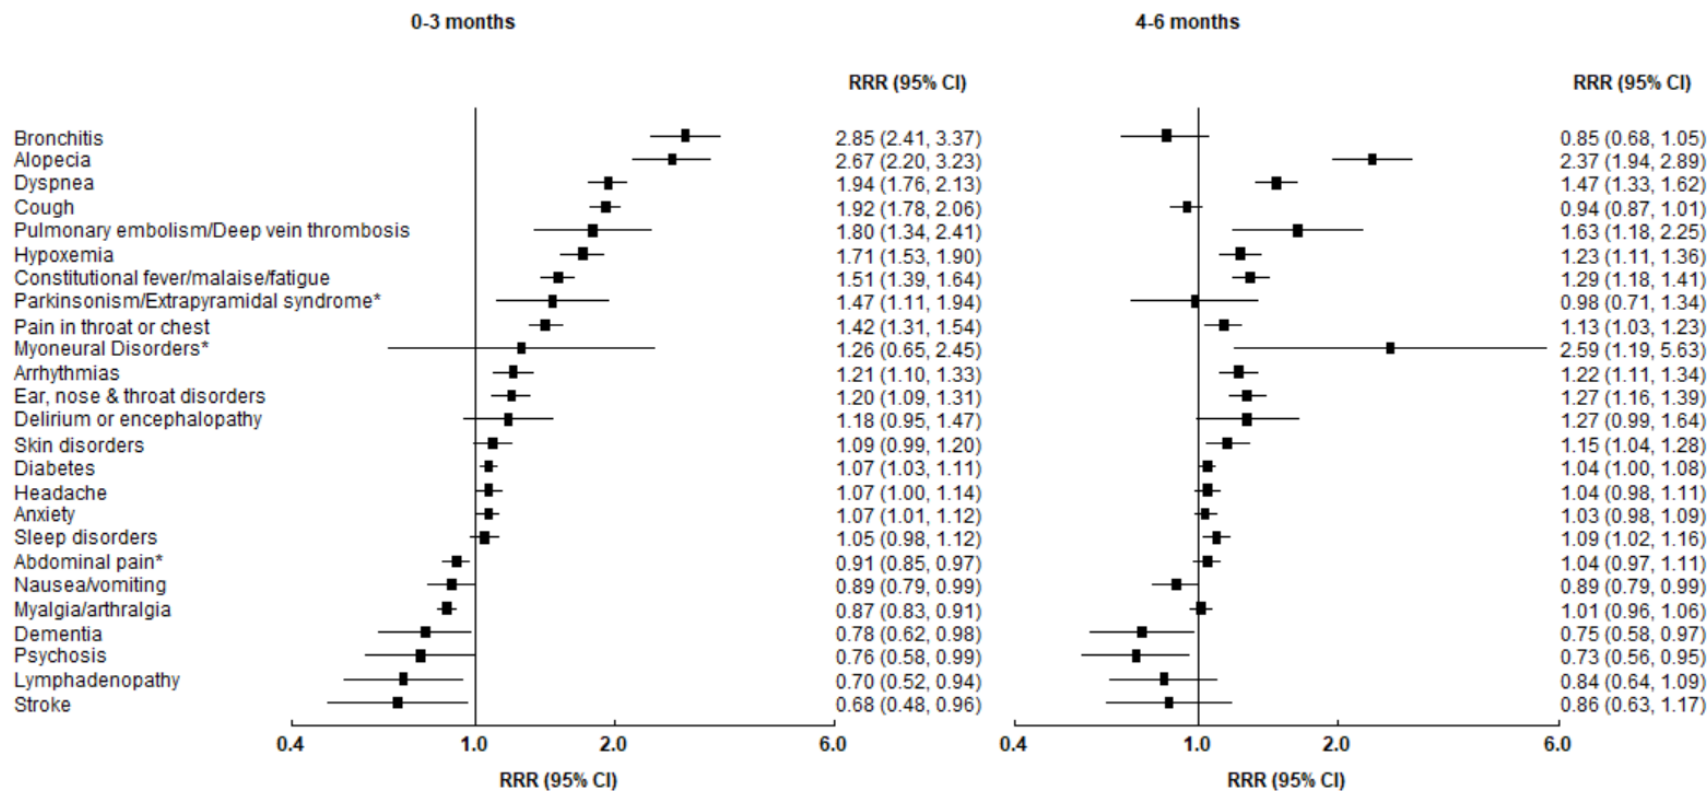

PCC = Post-COVID Conditions, RRR= Relative Rate Ratio, CI= Confidence Interval.

\*PCC category was not significant in combined analyses, but was significantly associated with COVID-19 diagnosis in time-stratified analyses (0-3 months or 4-6 months).

\*\*PCC categories presented are limited to those conditions that were statistically significant either in the overall findings or in time-stratified analyses (0-3 months or 4-6 months), excluding COVID-19 and infectious disease sequelae due to scale.

**eFigure 2.** Health Care Utilization for Select Post–COVID-19 Conditions (PCC)\* With and Without Censoring Follow-up at COVID-19 Vaccination

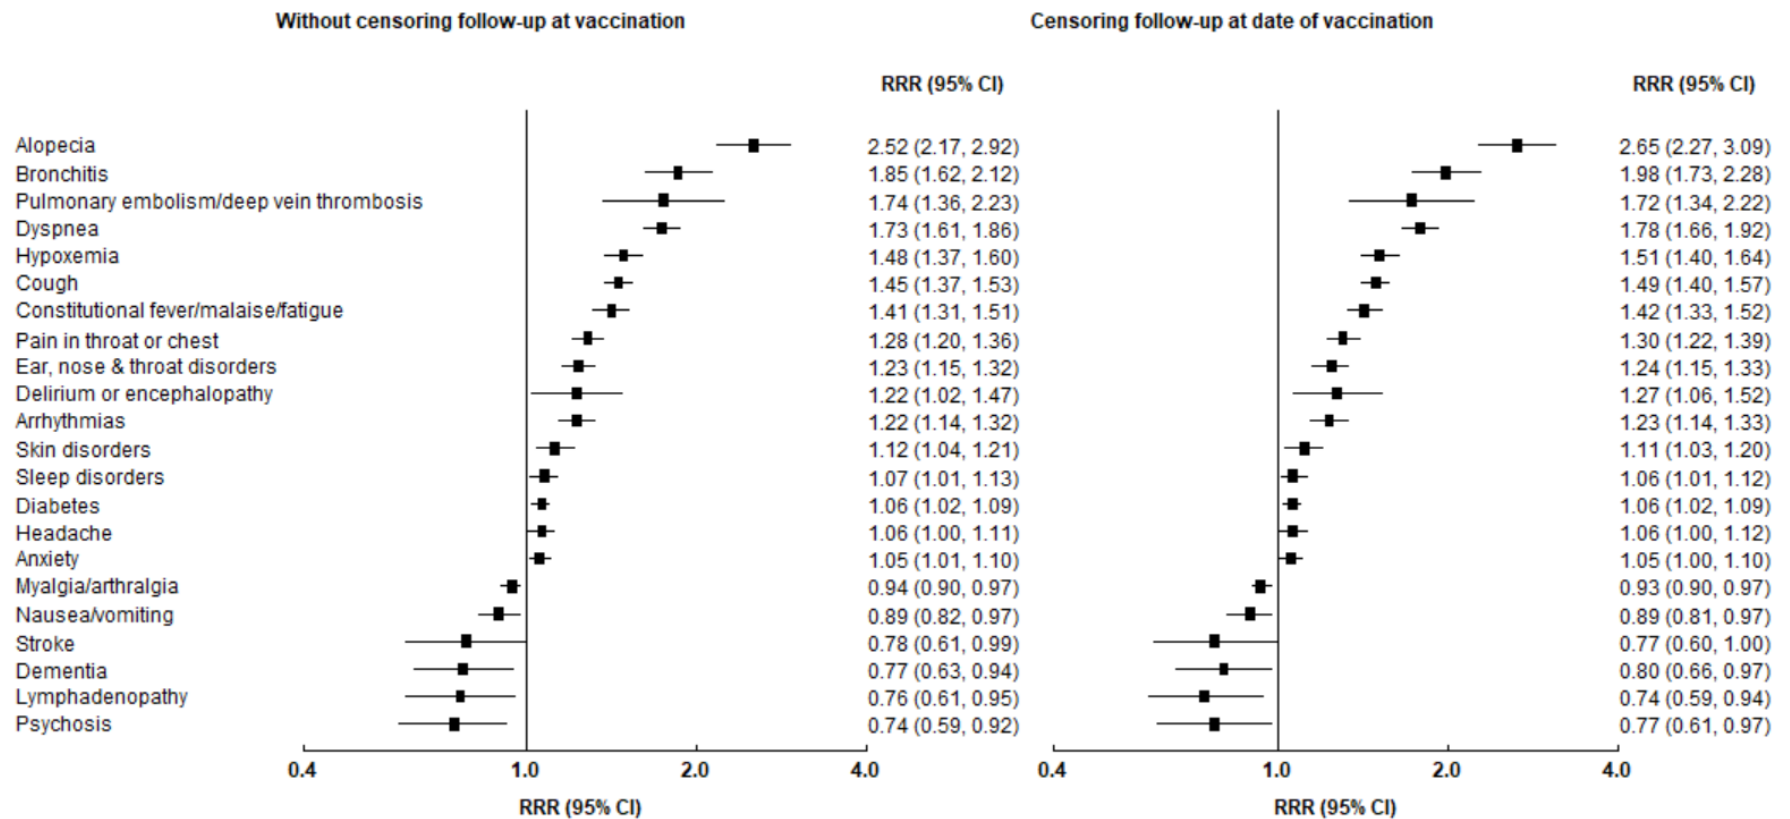

PCC = Post-COVID Conditions, RRR= Relative Rate Ratio, CI= Confidence Interval.

\*PCC outcomes presented are limited to those conditions that were statistically significant in the overall findings, excluding COVID-19 and infectious disease sequelae due to scale.



**eFigure 3.** Health Care Utilization for Select Post–COVID-19 Conditions (PCC)\* Among Children Aged Younger Than 18 Years

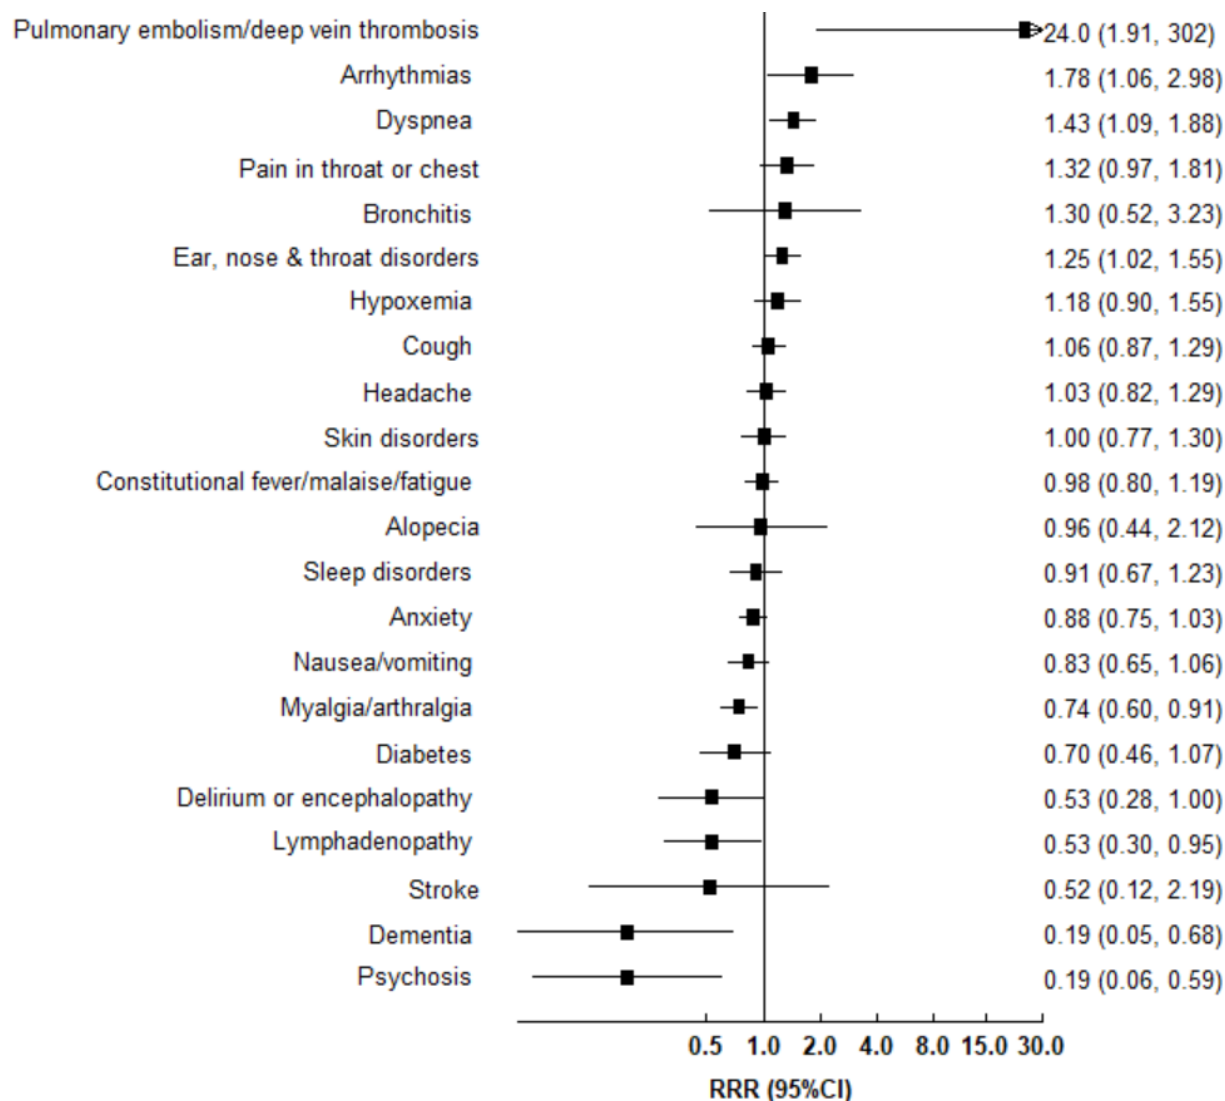

PCC = Post-COVID Conditions, RRR= Relative Rate Ratio, CI= Confidence Interval.

\*PCC outcomes presented are limited to those conditions that were either statistically significant overall or among children < 18 years. There was an insufficient number of events to calculate the RRR associated with infectious disease sequelae among children aged <18 years.
